# Supplementary material for: Correction of pseudoexon splicing caused by a novel intronic dysferlin mutation
Source: PubMed Central journal article supplement — Ann Clin Transl Neurol. 2019 Mar 3;6(4):642–54. doi: 10.1002/acn3.738 (PMC6469257; doi:10.1002/acn3.738), 2019-03-03
Supplement: ACN3-6-642-s001.pdf [file ACN3-6-642-s001.pdf]

# Correction of Pseudoexon Splicing Caused by a Novel Intronic Dysferlin Mutation

## Supporting Information

Figure S1.

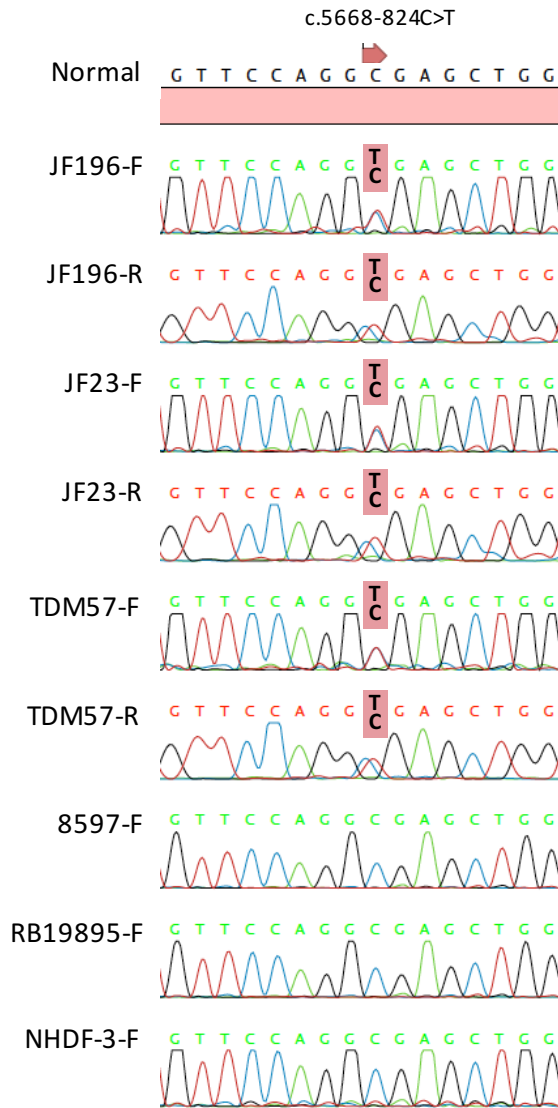

**Figure S1.** Analysis of genomic DNA from patients JF196, JF23 and TDM57 revealed that they are heterozygous for the c.5668-824C>T mutation deep within *DYSF* intron 50i. Genomic DNAs from patients' fibroblasts were amplified and sequenced using primer sets that tiled through 50i (Supplementary Table 1), revealing this mutation in these dysferlinopathy patient cells but not in fibroblasts from unrelated patients (8597: patient with other dysferlin mutations<sup>18</sup>; RB19895: ALS

patient) or normal human dermal fibroblasts (NHDF-3). Samples shown here were amplified using primers PE50.1-F and PE50.1-R then sequenced in the forward (F) and reverse (R) directions as indicated.

**Figure S2.**

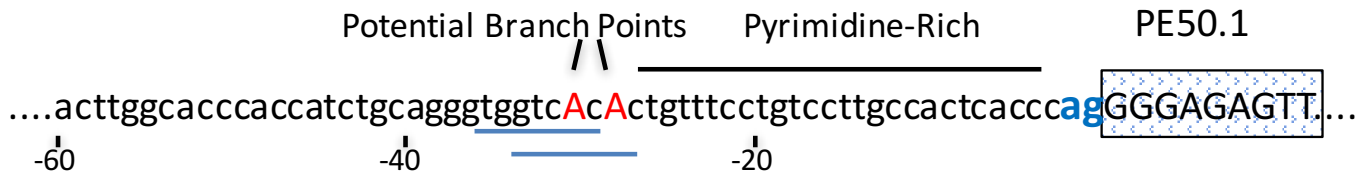

**Figure S2.** The intronic sequence upstream of pseudoexon PE50.1 contains additional consensus sites required for mRNA splicing. These include a splice acceptor sequence (ag) at the 5' end of PE50.1, an adjacent pyrimidine-rich region and two potential lariat branch point consensus sequences (underlined) that could be used to promote splicing. These sequences, in the presence of c.5668-824 C>T mutation, likely allow PE50.1 to be spliced between exons 50 and 51.

**Table S1.** Primers (forward (F) and reverse (R)) used to generate overlapping amplicons that span dysferlin intron 50i, and an additional primer set (PE50.1-F, PE50.1-R) useful for genotyping.

| <b>Primer Name</b> | <b>Sequence (5' – 3')</b> |
|--------------------|---------------------------|
| DYSF50i.1F         | TGGGAGGTGAAGGCAACTT       |
| DYSF50i.1R         | TGGAAAAGGGGTGGATGC        |
| DYSF50i.2F         | TCATGGCACTACCGTGGTC       |
| DYSF50i.2R         | GGAGGGTGATGGCTGTGG        |
| DYSF50i.3F         | GCCTATGGTCACCGTCCA        |
| DYSF50i.3R         | AATCGGGCCAGCAGAATC        |
| DYSF50i.4F         | GTCCCACCCGGCATTAAA        |
| DYSF50i.4R         | TTGGGGCAGATGCAACCT        |
| DYSF50i.5F         | GAAAGCATGGGCCGTTTG        |
| DYSF50i.5R         | AATGGAGCCACCCCAAAT        |
| DYSF50i.6F         | AGAGAGGGTTACCCGGCAGT      |
| DYSF50i.6R         | GTTTCTGTCTCCGCCTTCG       |
| DYSF50i.7F         | GGGAGAAGGTGGCTGGAA        |
| DYSF50i.7R         | CTGACGTGCAGGGTGTGC        |
| DYSF50i.8F         | GCGGCTTTGAACCACCAC        |
| DYSF50i.8R         | AGCTCCCGAACCGAAGAC        |
| DYSF50i.9F         | CCAACCCAGGCAGCAGTC        |
| DYSF50i.9R         | CAGCTCGCCTGGAACAAG        |
| DYSF50i.10F        | CAGTCCCACACCGCTCAG        |
| DYSF50i.10R        | TATGCGTTGGCCCTCTACTG      |
| DYSF50i.11F        | CAGCTGCCAGGGTTTGAG        |
| DYSF50i.11R        | GGATGCAAGGAAGCAAGGT       |
| DYSF50i.12F        | CCCTTGGGGACATCCTACTC      |
| DYSF50i.12R        | ACTTGCGTCCCTCGCTTAC       |
|                    |                           |
| PE50.1-F           | CCCGGCACTCAGGACTTG        |
| PE50.1-R           | TGCTGGGAAGTTCCGTCTC       |

**Table S2.** AONs targeting human exonic splicing enhancer sequences (ESE) in DYSF PE50.1. AONs for *in vitro* studies are 2'-O-methyl RNA with full-length phosphorothioate backbones.

| <b>AON</b>    | <b>AON Sequence (5' - 3')</b> | <b>Target Sequence (sense strand) (5' - 3')</b> |
|---------------|-------------------------------|-------------------------------------------------|
| DYSF50.1 AON1 | AGUCUUGUUCUCUGUUUUCUCA        | TGAGAAAACAGAGAACAAGACT                          |
| DYSF50.1 AON2 | ACUGAGGCUUCAUGGAGCAAC         | GTTGCTCCATGAAGCCTCAGT                           |
| DYSF50.1 AON3 | GGUCAUCUUGGGCUUCCUCCCAC       | GTGGGAGGAAGCCCAAGATGACC                         |

**Table S3.** Primers (forward (F) and reverse (R)) used in quantitative PCR assays to analyze *DYSF* mRNA expression.

| Target detected             | PCR Primer Name    | Sequence (5' - 3')   |
|-----------------------------|--------------------|----------------------|
| Exon 50-PE50.1 (Mutant)     | DYSF50/51-QF       | CGTGCATTATCGTTCCTGG  |
|                             | DYSF50/PE50.1-QR.1 | CAGCGCAGTCTTGTTCTCTG |
| Exon 50-51 (Normal)         | DYSF50/51-QF       | CGTGCATTATCGTTCCTGG  |
|                             | DYSF50/51-QR.1     | AAGGCATCCTTCTTGCA    |
| Exon 13-14 (Common, Normal) | DYSF 13/14-QF      | CTTGCGGGGAAAATGCTGT  |
|                             | DYSF 13/14-QR      | TCATTGTGAGTCAGGCGGTC |
